# Supplementary material for: Efficacy of physical therapy for the treatment of lateral epicondylitis: a meta-analysis
Source: Springer Nature journal article supplement (doi:10.1186/s12891-015-0665-4), 2015-08-24

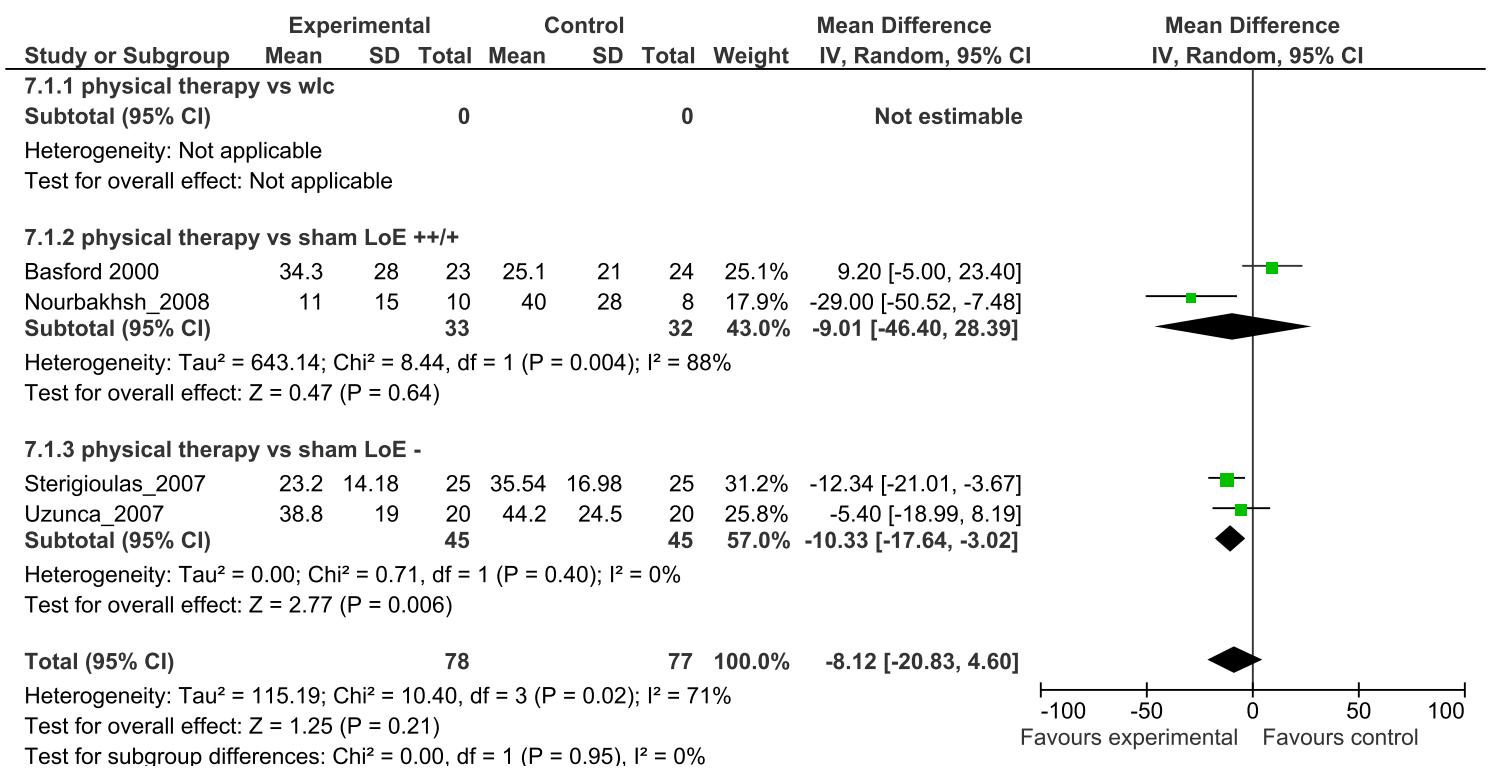

Supplement: MOESM3 [file 9752544]
